# Supplementary material for: Machine-learning models of δ 13 C and δ 15 N isoscapes in Amazonian wood
Source: Copernicus journal article supplement (doi:10.5194/egusphere-2025-5452), 2025-11-13
Supplement: Supplementary file [file egusphere-2025-5452-AC1-supplement.pdf]

## Reply to comments on “Machine-learning models of $\delta^{13}\text{C}$ and $\delta^{15}\text{N}$ isoscapes in Amazonian wood” by Souza-Silva et al.

We are grateful to the editor and reviewers for their thorough assessment of our manuscript. Their detailed feedback and thoughtful suggestions have been instrumental in refining the study. We have carefully addressed all comments and outline our responses below.

### Referee 1

General comments:

The manuscript describes an extensive sampling of  $^{15}\text{N}$  and  $^{13}\text{C}$  in wood across the Amazon. A major goal of the project is to investigate whether isotopes can be used to provenance lumber, with relevance to monitoring illegal logging. Towards this goal, random forests models are fitted to the isotope datasets using a large suite of assembled spatial, ecological, pedological, and climatological covariates. RF models are subsequently used to produce isoscapes: spatially resolved isotope predictions across the Amazon. Patterns of isoscape variation are discussed in the context of various ecological factors.

Major comments :

1. Given the collection of two independent isotope signals, I wonder at the missed opportunity here to generate a combined isoscape of  $^{13}\text{C}$  and  $^{15}\text{N}$  variation. It seems the combined variation in both isotopes would be more spatially variable given distinct controls. Mapping the product of the two, or some other decomposition or principal component, could actually generate a more useful metric.

**Response:** We thank the reviewer for this insightful suggestion. We concur that analyzing  $\delta^{13}\text{C}$  and  $\delta^{15}\text{N}$  together could enhance spatial contrast for geographic attribution, especially since these isotopes are influenced by largely distinct environmental drivers. Composite metrics and multivariate approaches, including principal component analysis, can indeed play a valuable role in provenance-oriented analyses. Nevertheless, the primary objective of this study is to establish isotope-specific reference isoscapes for Amazonian wood and to investigate the environmental and biogeochemical controls on each isotope system, rather than to perform formal sample assignment or to construct a unified provenance index.

Although both  $\delta^{13}\text{C}$  and  $\delta^{15}\text{N}$  exhibit coherent basin-scale spatial patterns, their pronounced within-site variability currently constrains their standalone applicability for fine-scale provenance assignment. We address this limitation in the Conclusion, where we highlight that  $\delta^{13}\text{C}$  and  $\delta^{15}\text{N}$  should primarily be considered as a solid basis for regional-scale monitoring and for initial screening of potentially suspicious timber, rather than as conclusive indicators of origin. In this sense, these isotopes are best interpreted as complementary evidence that can inform provenance assessments, recognizing that more accurate assignments will likely depend on incorporating additional isotopic tracers that reflect independent environmental signals. We therefore recognize the reviewer's recommendation as a promising direction for future work. Subsequent studies could embed these isotope-specific isoscapes within multivariate provenance frameworks, potentially alongside other isotopic systems, such as sulfur or strontium, to enhance assignment accuracy and refine geographic discrimination.

2. The study effort, particularly around sample collection, is ambitious and admirable. I agree that the current results are not particularly useful for provenance verification. But perhaps combined with other isotope maps (strontium?) could be in the future.

**Response:** We thank the reviewer for this positive assessment of the sampling effort. We agree that, on their own, the  $\delta^{13}\text{C}$  and  $\delta^{15}\text{N}$  isoscapes presented here are not intended for definitive provenance verification at fine spatial scales. As emphasized in the manuscript, these isotope systems are best suited for regional-scale monitoring and preliminary screening. We also agree that integrating carbon and nitrogen isoscapes with other isotopic systems represents a promising avenue for further research. In this context, a strontium isoscape for the Amazon basin has recently been developed (Martinelli et al., 2025) and provides an independent geochemical framework that could, in future studies, be combined with the  $\delta^{13}\text{C}$  and  $\delta^{15}\text{N}$  isoscapes presented here within a multi-isotope provenance approach.

3. The machine-learning methods appear robust, but I would be curious to see added some additional discussion around systematic bias of the RF models, which appear to underpredict high values and overpredict low values systematically.

**Response:** We thank the reviewer for this observation. We agree that the Random Forest models show a tendency to underpredict higher values and overpredict lower values, a pattern that is evident in the observed versus predicted relationships (Figs. 5a and 7a) and is characteristic of ensemble tree-based regression methods. To address this point, we have added an explicit discussion of this behavior in the Discussion section, as the beginning paragraph of Section 4.4 (Limitations and perspectives). The following paragraph has been inserted: *“Although a systematic model bias is observed, characterized by a tendency to overpredict low isotope values and underpredict high values, the overall performance of the Random Forest models remains robust at the basin scale. This conservative smoothing behavior reflects a regression-to-the-mean effect inherent to ensemble tree-based methods and is amplified when data density is highest in the intermediate range of values and sparser at the extremes. Importantly, this behavior does not indicate a spatially structured bias and instead supports stable basin-scale predictions by reducing overfitting”*.

Minor comments:

- Line 123. Perhaps worth explaining how a sample was collected 215 km from a road, and how frequent such samples are in the dataset. I am imagining this was transported by boat? Then could redefine as distance from road or river?

**Response:** We thank the reviewer for this request for clarification. The reported maximum distance of 215 km does not represent the distance of a sample from a road or river, but rather the maximum pairwise distance between individual trees within a single sampling site, based on their geographic coordinates. This value corresponds to a single individual that was located approximately 215 km from the other sampled trees at the same site, resulting in an unusually large intra-site distance. This situation reflects the vast territorial extent of some Amazonian municipalities, where a single “site” may encompass a very large area. Importantly, this is an isolated case in the dataset and involves only one individual. For the vast majority of sites, sampled trees are clustered within a few kilometers of each other, with a median intra-site distance of less than 1 km, which better represents the typical spatial configuration of our sampling design.

- Fig 1. This figure could be made more useful by somehow depicting sample size at each site, either as point size / color or with a number. This would allow visualization of the distribution of sampling intensity across the region.

**Response:** We thank the reviewer for this helpful suggestion. We agree that visualizing sampling intensity across sites provides important context for interpreting the spatial distribution of the dataset. Figure 1 has therefore been revised to explicitly display sample size at each site. Sampling intensity is now represented by varying point sizes, allowing readers to readily assess the number of sampled individuals per site across the Amazon region. More detailed and precise information on the number of individuals sampled at each site is also provided in Table 1. This modification enhances the interpretability of the figure while preserving its original purpose of illustrating the geographic extent of the sampling effort.

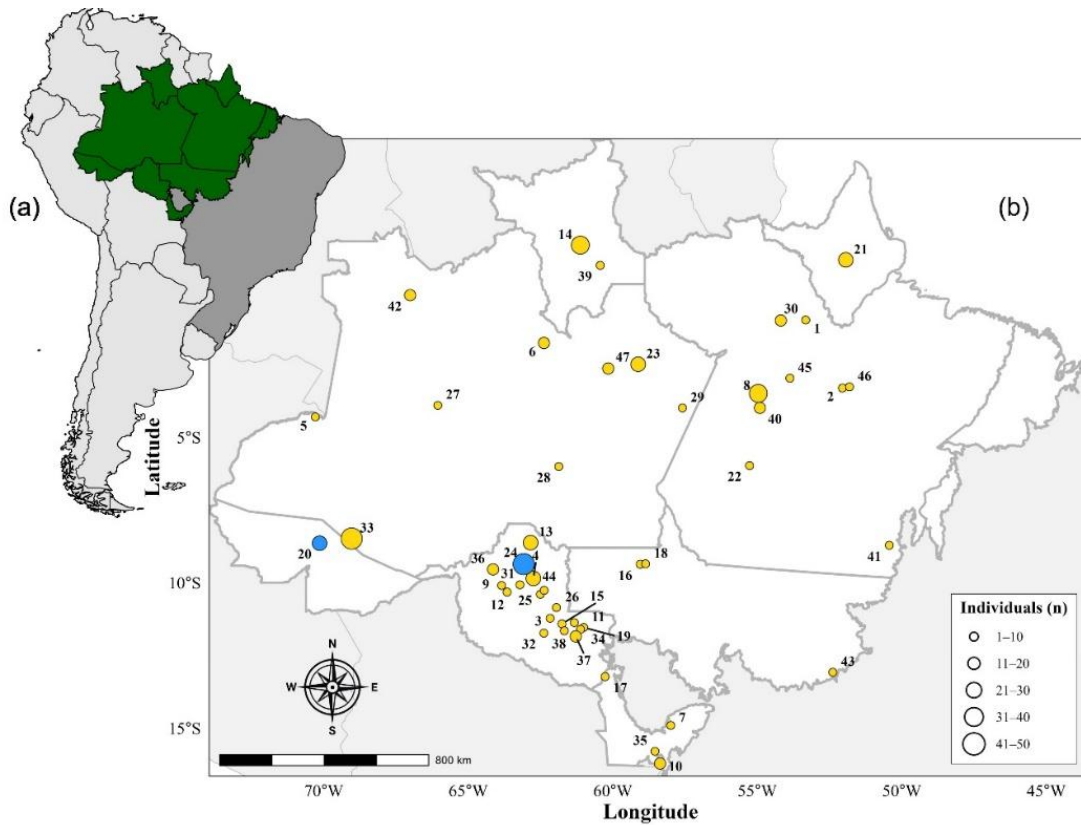

**Figure 1.** Sampling sites across the Brazilian Amazon. (a) South America, with emphasis on the Brazilian Amazon region. (b) Distribution of sampled individuals across 47 sites in the Brazilian Amazon. Numbers correspond to site identifiers listed in Table 1. The map highlights the states where sampling took place, with grey lines indicating state boundaries. Yellow symbols represent sampled sites, while blue symbols (sites 20, *Feijó*, and 24, *Itapuã do Oeste*) indicate the locations analyzed in detail in this study. Symbol size is scaled according to the number of individuals sampled per site (see legend). South America boundaries were obtained from Natural Earth (2023), and the Amazon biome polygon from Assis et al. (2019).

- L349. You might refer to this as bias.  $^{13}\text{C}$  isoscape also exhibits the same bias.

**Response:** We thank the reviewer for this clarification and have revised the text around L349 to explicitly refer to this behavior as a systematic bias, noting that it is common to both the  $\delta^{13}\text{C}$  and  $\delta^{15}\text{N}$  isoscapes. We decided to insert a new paragraph after L288 (line according to the revised version of the manuscript) to demonstrate that this behavior represents a bias. *“The scatter plot of observed versus predicted  $\delta^{13}\text{C}$  values reveals an approximately linear relationship (Fig. 5a). However, the fitted regression line (black) deviates from the identity line (dashed), indicating a tendency to overestimate  $\delta^{13}\text{C}$  at the lower end of the distribution (more negative  $\delta^{13}\text{C}$  values) and to underestimate at the upper end. This systematic deviation can be referred to as a model bias, characterized by regression toward the mean. The highest density of points occurs within the intermediate  $\delta^{13}\text{C}$  range ( $-28$  to  $-27$  ‰), with fewer observations toward both extremes.”* In addition to this paragraph, we revised the text at L319 (line according to the revised version of the manuscript), where the original paragraph has been replaced by the following: *“The scatter plot of observed versus predicted  $\delta^{15}\text{N}$  values demonstrates a predominantly linear trend across the entire range of variation (Fig. 7a). A systematic deviation is apparent, consistent with the conservative smoothing observed for  $\delta^{13}\text{C}$ , with higher  $\delta^{15}\text{N}$  values being underestimated and lower values being overestimated. The majority of data points are densely populated in the intermediate sector, specifically between 3.5 ‰ and 5.5 ‰, whereas fewer observations are located at the extremes of the distribution”*.

- L440. Many sites have  $\delta^{13}\text{C}$  variation of around 3–4 per mil. So while I suppose this is true, inter-site variability is not much greater than within site.

**Response:** We thank the reviewer for this careful observation and agree that many sites exhibit substantial within-site  $\delta^{13}\text{C}$  variability, often on the order of 3–4‰. Such pronounced intra-site variability is expected in Amazonian forests and reflects strong ecological, physiological, and taxonomic heterogeneity operating at local scales. As discussed in the manuscript, this local-scale variability coexists

with broader-scale environmental gradients that structure  $\delta^{13}\text{C}$  variation across the basin. Importantly, a similar magnitude of intra- and inter-site variability does not imply the absence of meaningful spatial differentiation. Previous studies have shown that, despite high within-site heterogeneity, between-site differences in  $\delta^{13}\text{C}$  remain detectable and informative at regional scales. For example, Batista et al. (2025) documented pronounced intra-site variability in Amazonian tree-ring  $\delta^{13}\text{C}$  while still identifying a dominant inter-site component. Accordingly, our results support the interpretation that  $\delta^{13}\text{C}$  isoscapes are most informative for regional-scale patterns rather than fine-scale site discrimination.

## References

- Batista, A. C. G., Silva, I. M. S., Silva Araújo, M. G. D., Amorim, D. J., Nardoto, G. B., Costa, F. J. V., Higuchi, N., Tomazello-Filho, M., Barbosa, A. C., Costa, V. E., Ponton, S., and Martinelli, L. A. (2025). *Within- and between-site variability of  $\delta^{18}\text{O}$ ,  $\delta^{13}\text{C}$ , and  $\delta^{15}\text{N}$  in Amazonian tree rings: Climatic drivers and implications for geographic traceability.* **Forest Ecology and Management**, 597, 123168. <https://doi.org/10.1016/j.foreco.2025.123168>.
- Martinelli, L., Bataille, C., Batista, A., Souza-Silva, I., Araújo, M., Abdalla Filho, A., Brunello, A., Tommasiello Filho, M., Higuchi, N., Barbosa, A., Costa, F., and Nardoto, G. (2025). *Bioavailable strontium isoscape for the Amazon region using tree wood.* **Forest Ecology and Management**, 594, 122963. <https://doi.org/10.1016/j.foreco.2025.122963>.
